# Supplementary material for: Nanoconnectomic upper bound on the variability of synaptic plasticity
Source: eLife journal article supplement (doi:10.7554/elife.10778), 2015-11-30

Distance Along Axon

Distance Along Dendrite

**A**

Same Dendrite

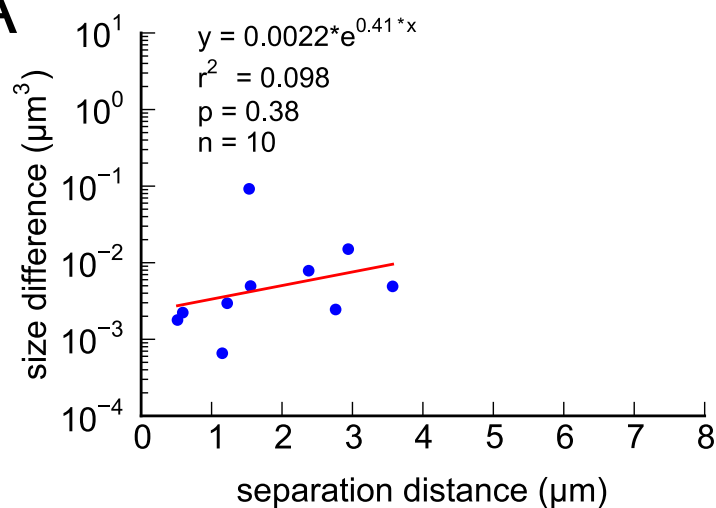**D**

Same Dendrite

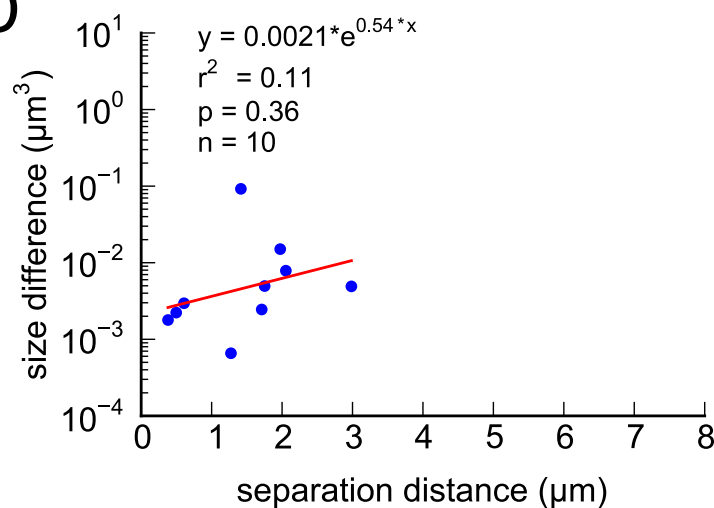**B**

Different Dendrites

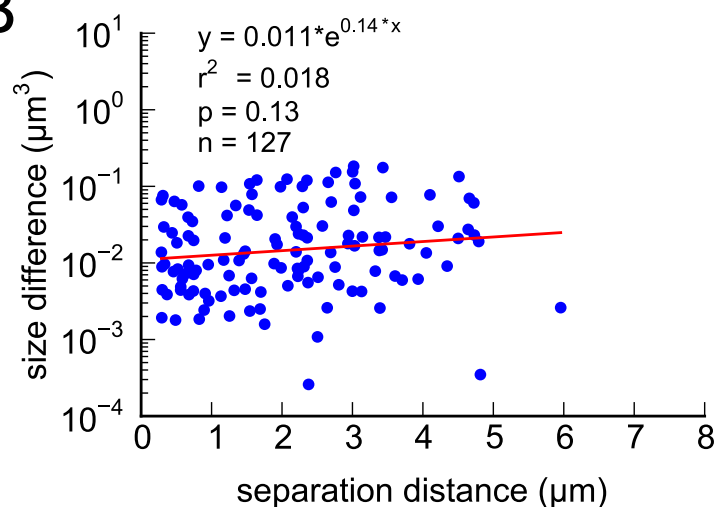**E**

Different Dendrites

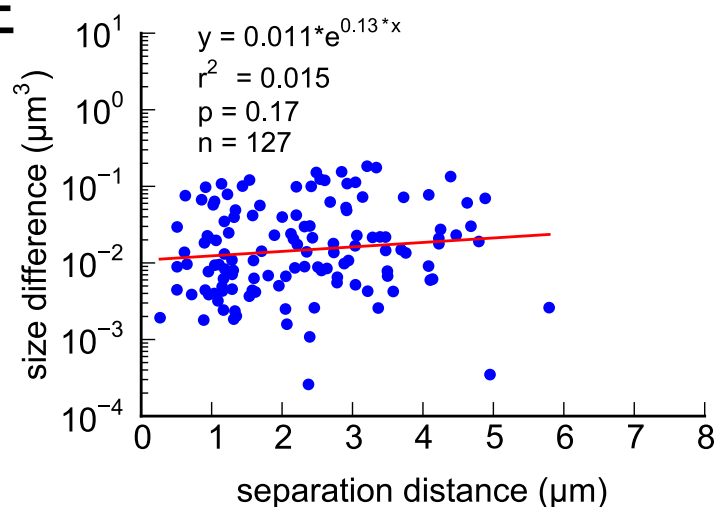**C**

Random Pairs

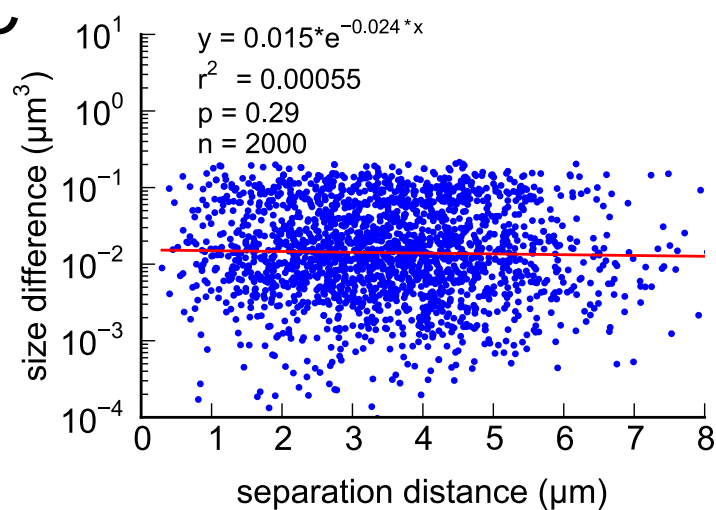**F**

Random Pairs

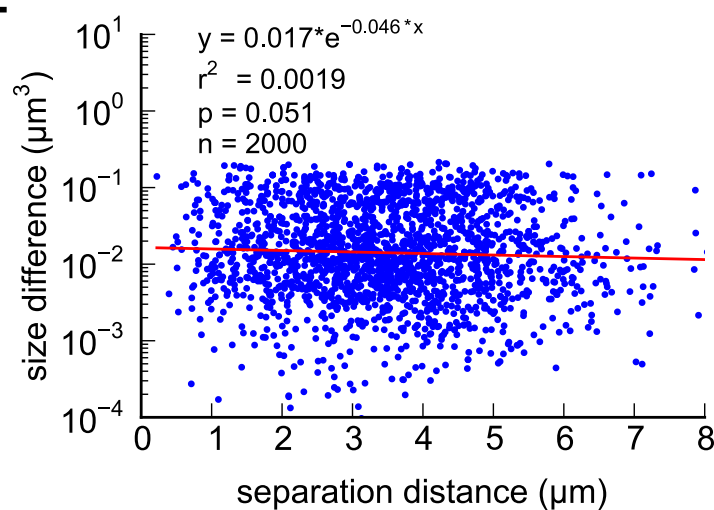

Supplement: supp [file elife_poa_e10778_Figure_6_figure_supplement_2.pdf › elife_poa_e10778_Figure_6_figure_supplement_2.pdf]
