# Supplementary figures and images for: Nanoconnectomic upper bound on the variability of synaptic plasticity
Source: eLife journal article supplement (doi:10.7554/elife.10778), 2015-11-30

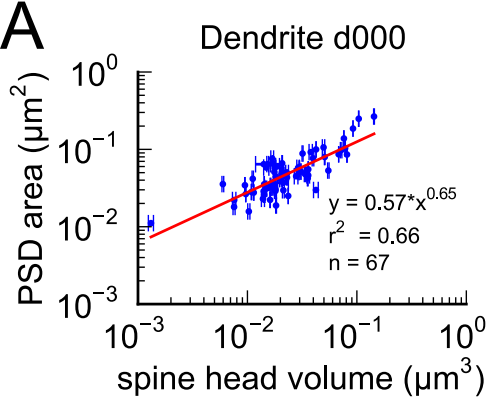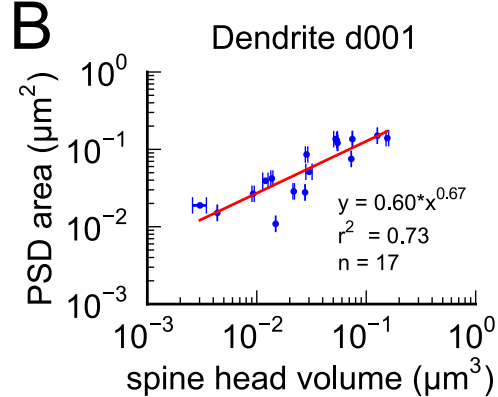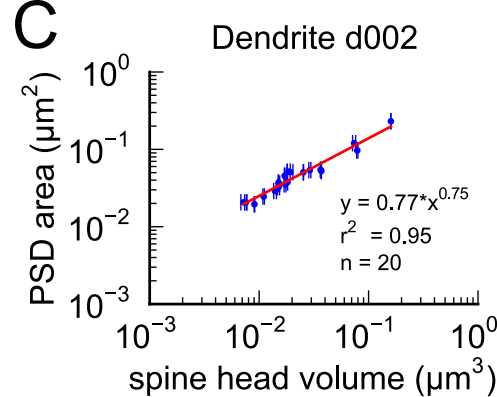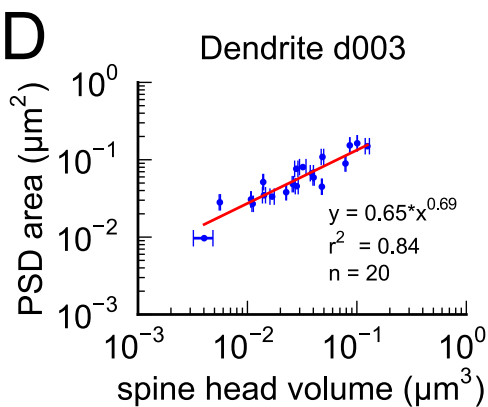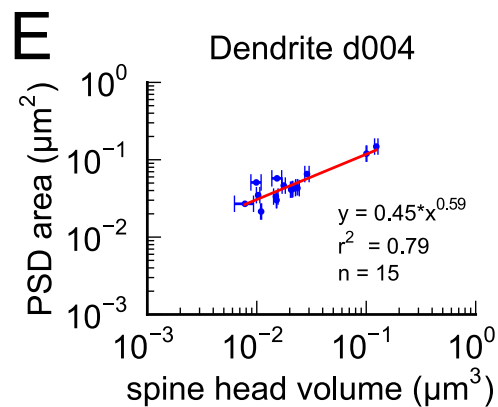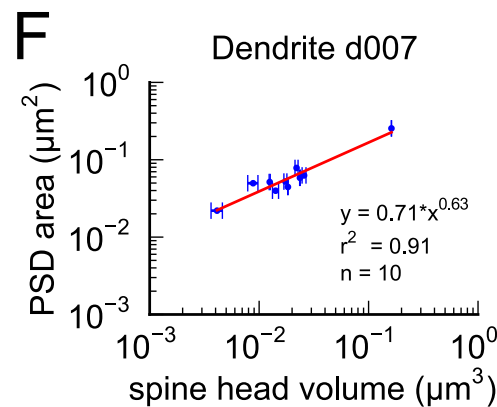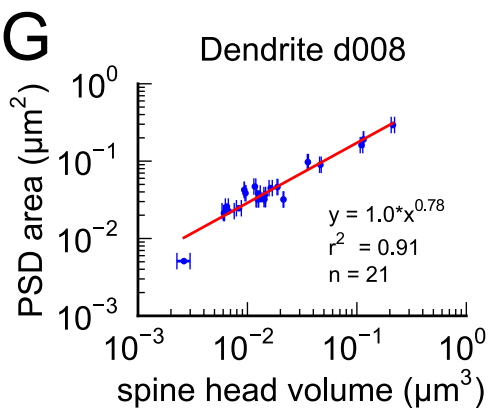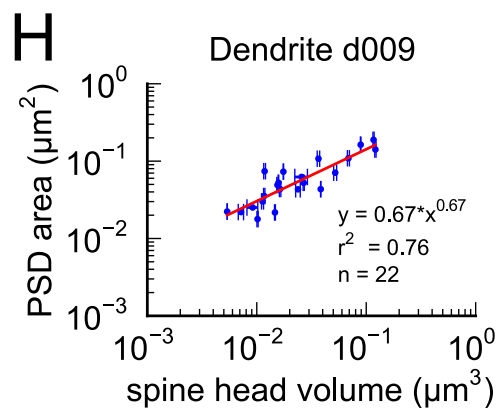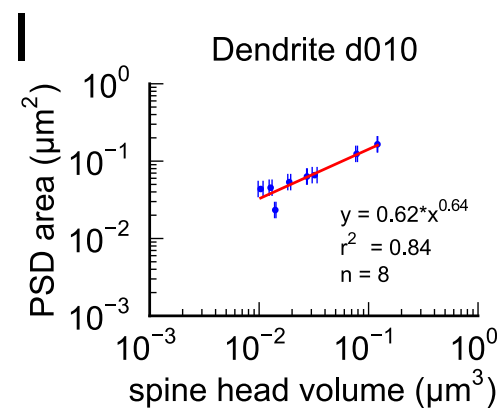

Supplement: supp [file elife_poa_e10778_Figure_1_figure_supplement_1.pdf › elife_poa_e10778_Figure_1_figure_supplement_1.pdf]

A

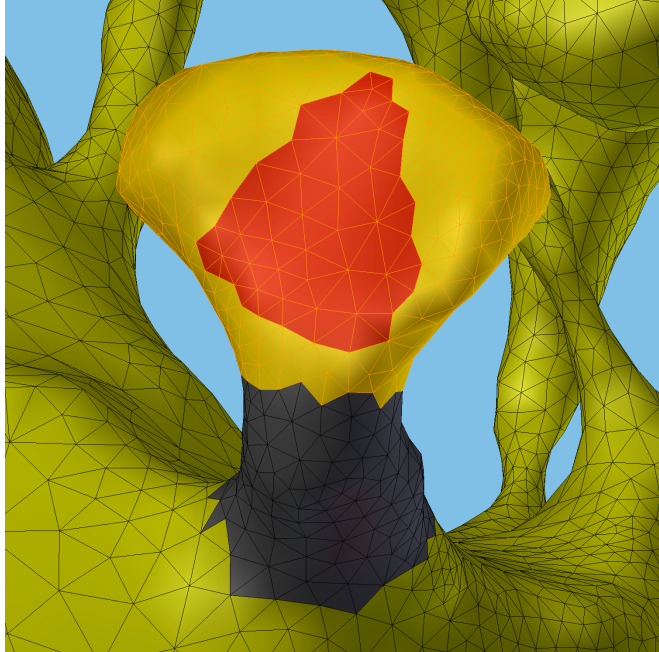

B

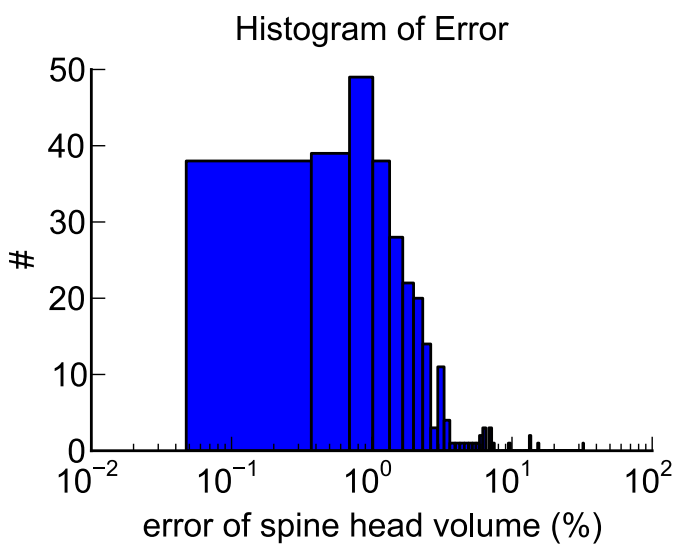

C

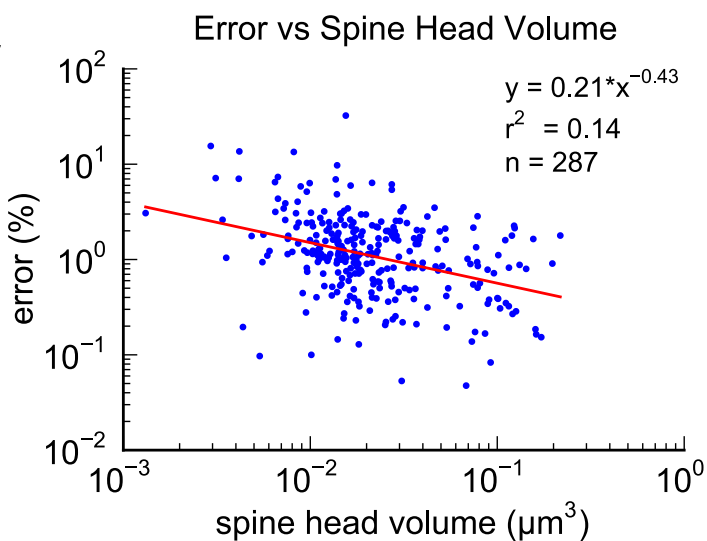

Supplement: supp [file elife_poa_e10778_Figure_3_figure_supplement_1.pdf › elife_poa_e10778_Figure_3_figure_supplement_1.pdf]

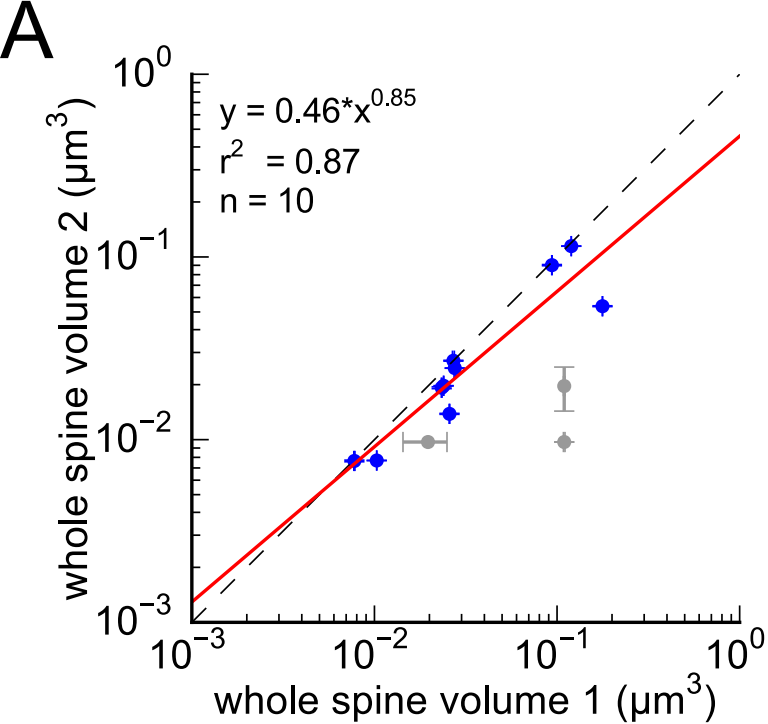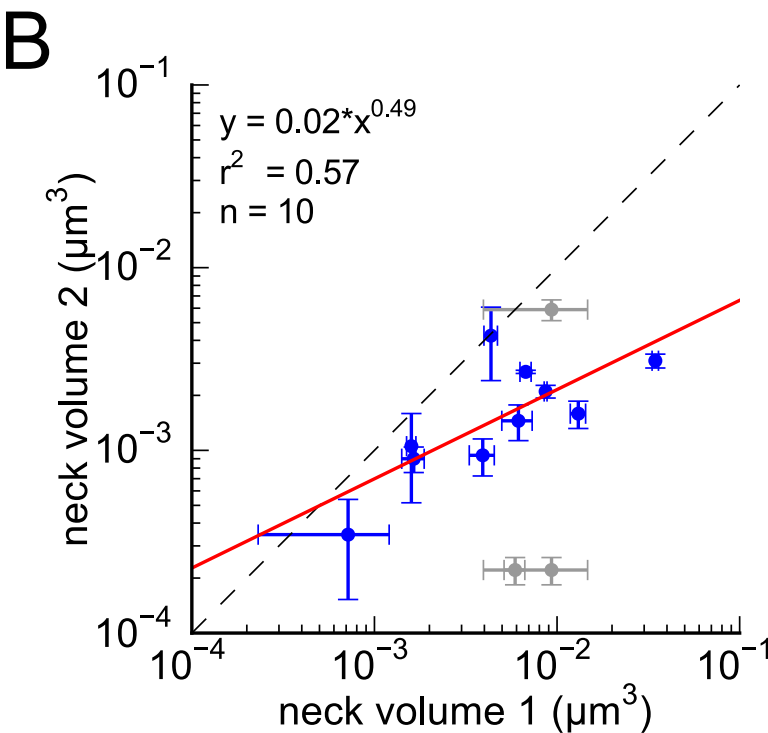

Supplement: supp [file elife_poa_e10778_Figure_4_figure_supplement_1.pdf › elife_poa_e10778_Figure_4_figure_supplement_1.pdf]

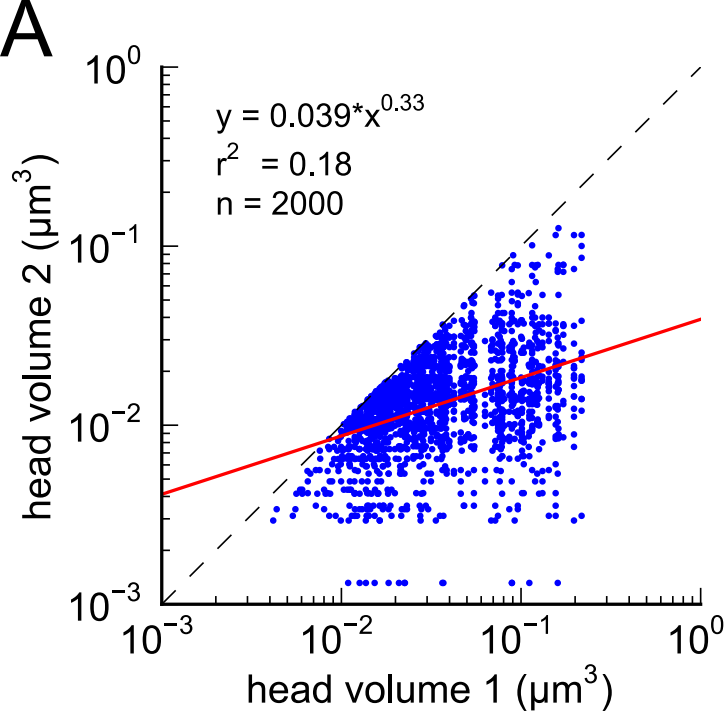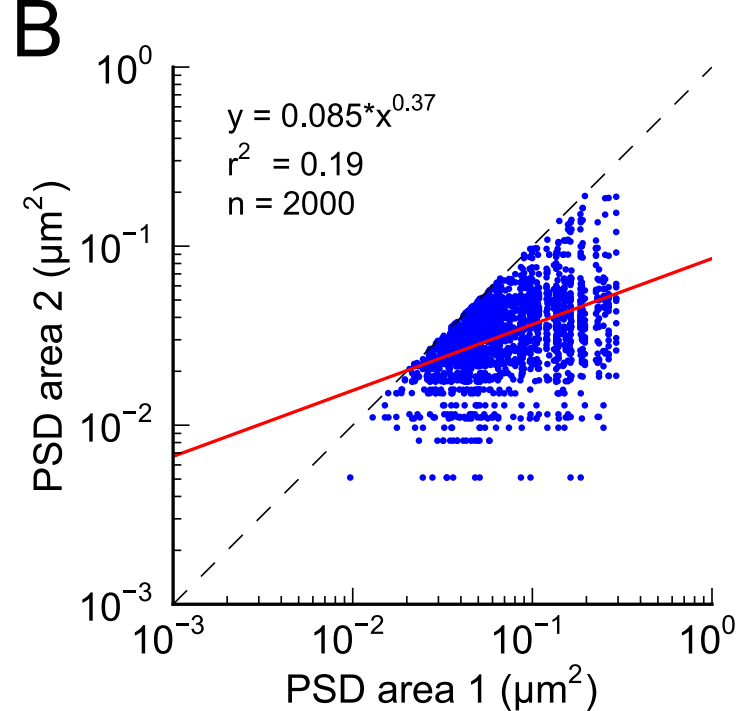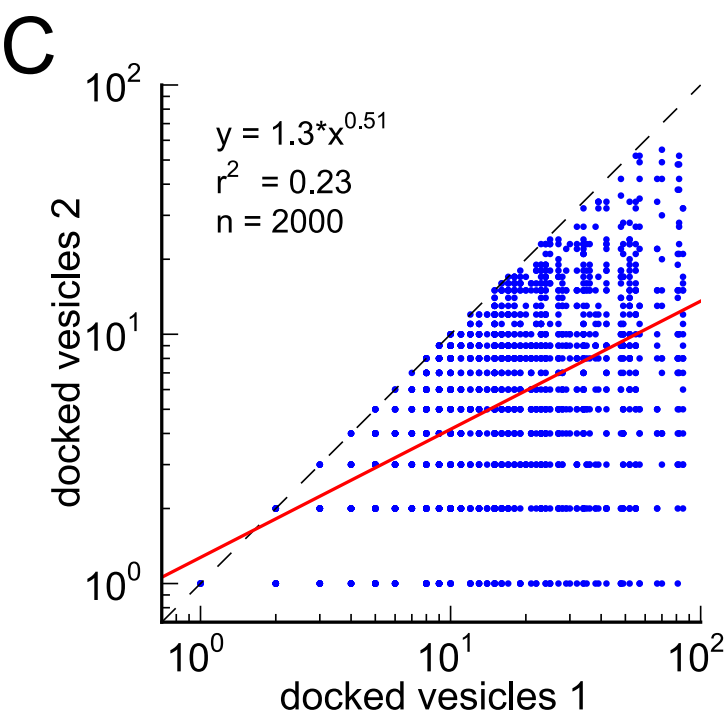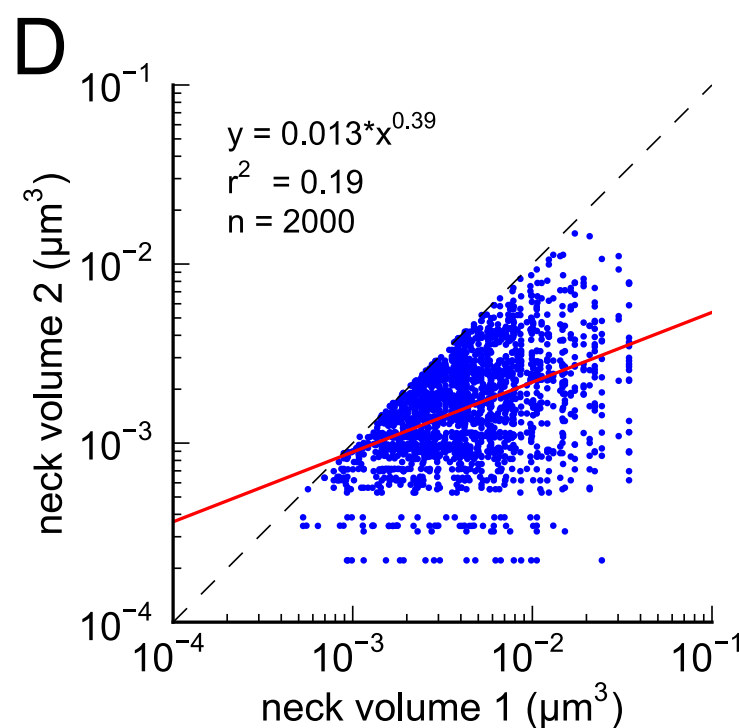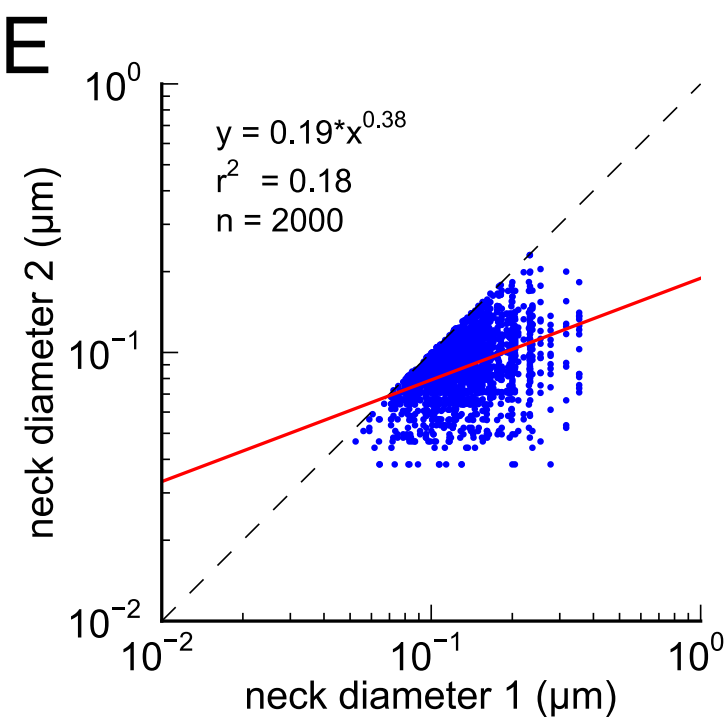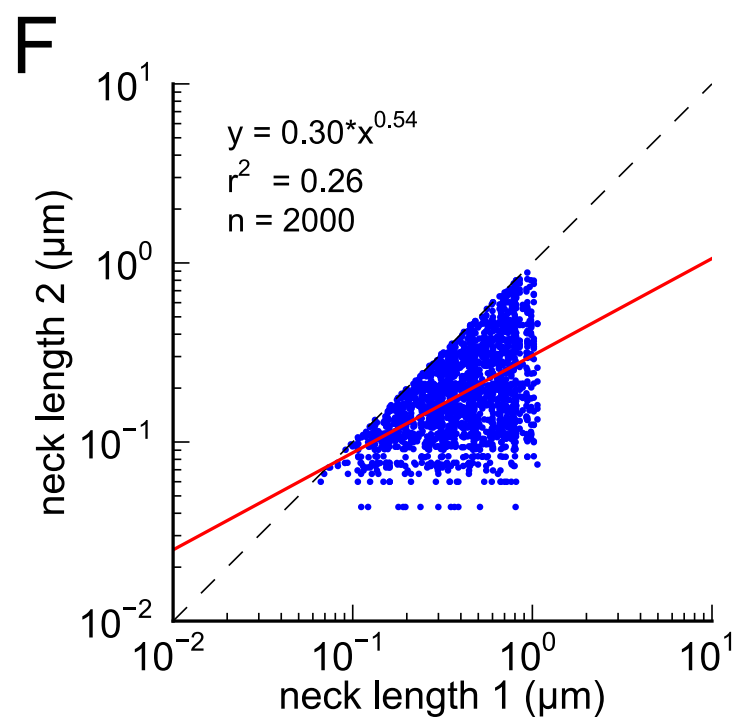

Supplement: supp [file elife_poa_e10778_Figure_4_figure_supplement_2.pdf › elife_poa_e10778_Figure_4_figure_supplement_2.pdf]

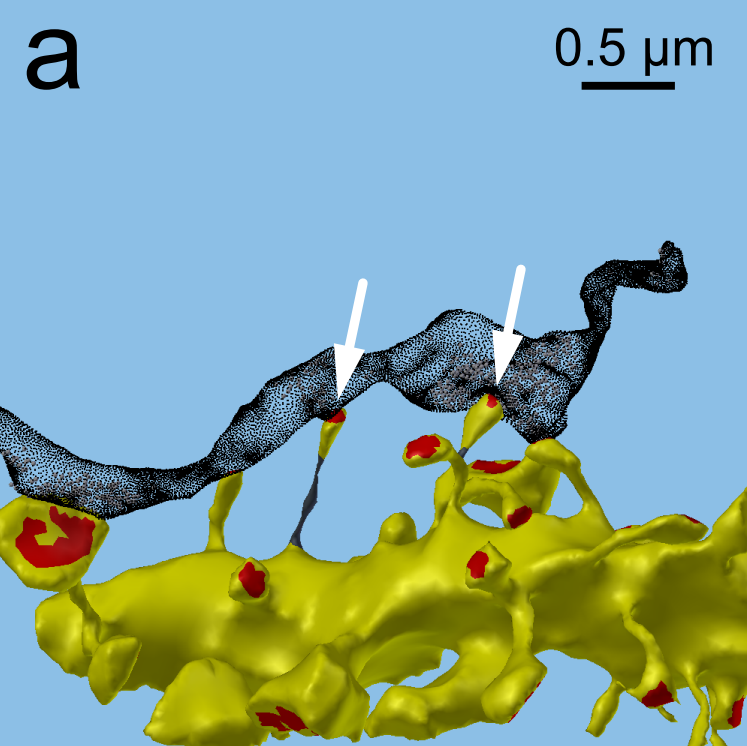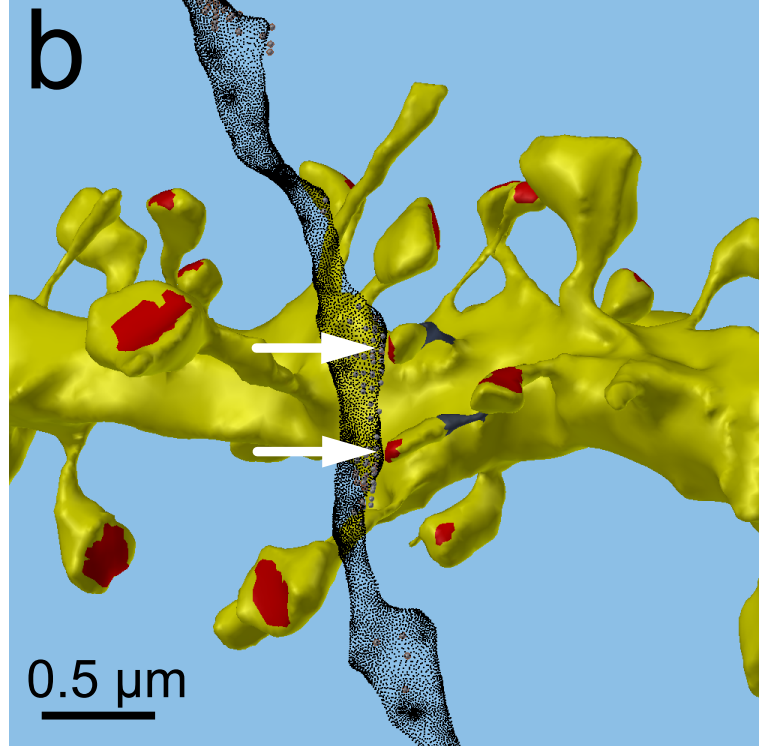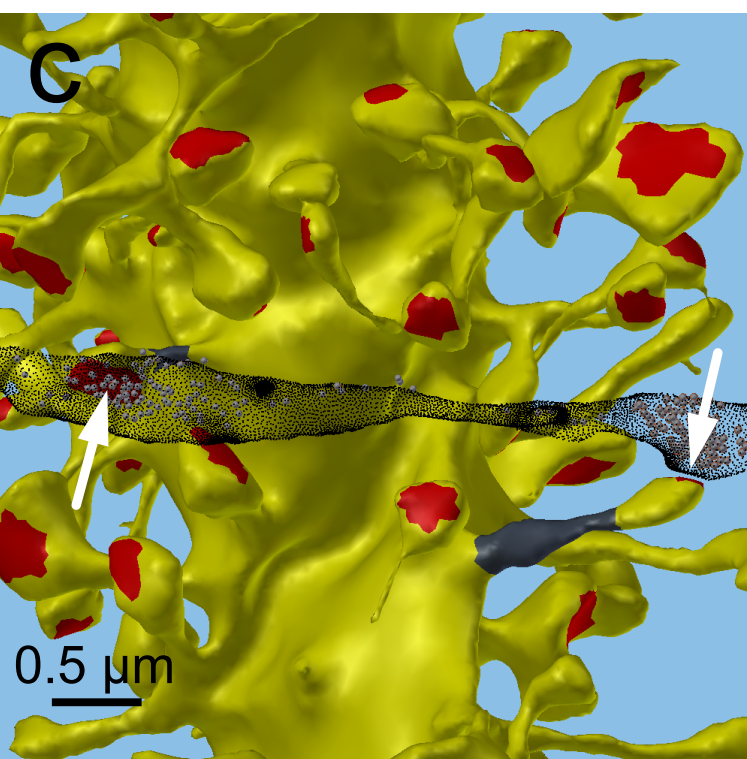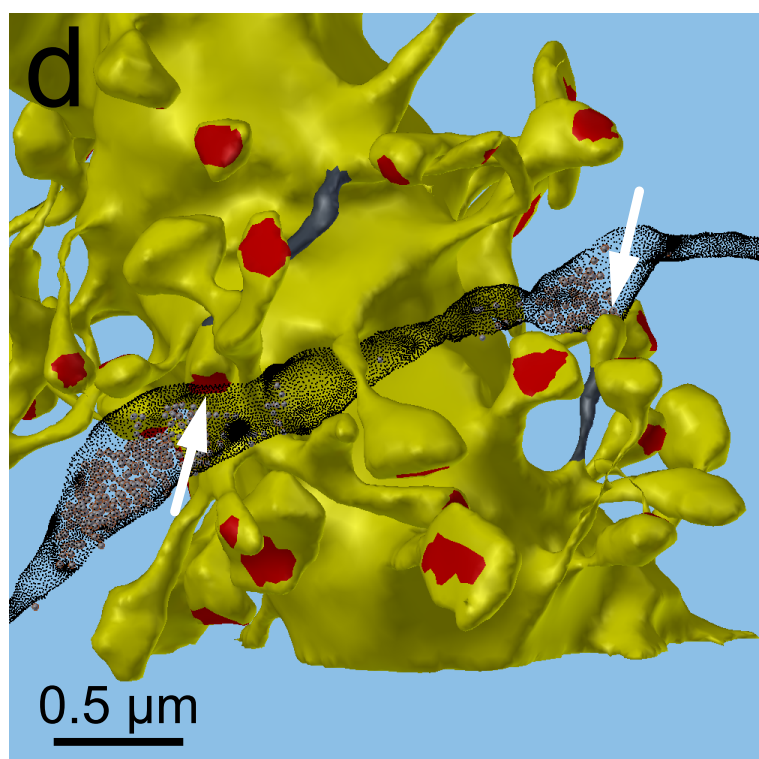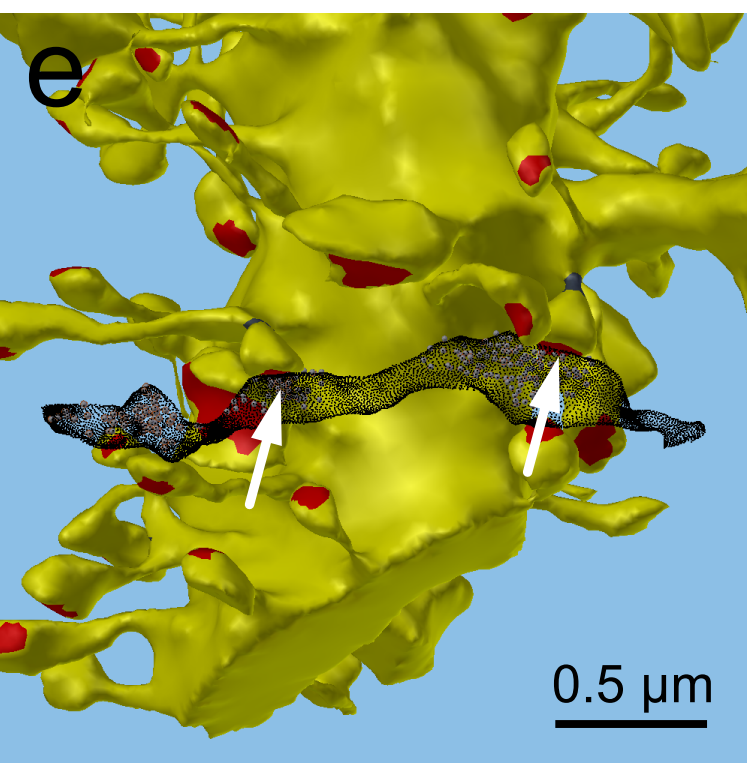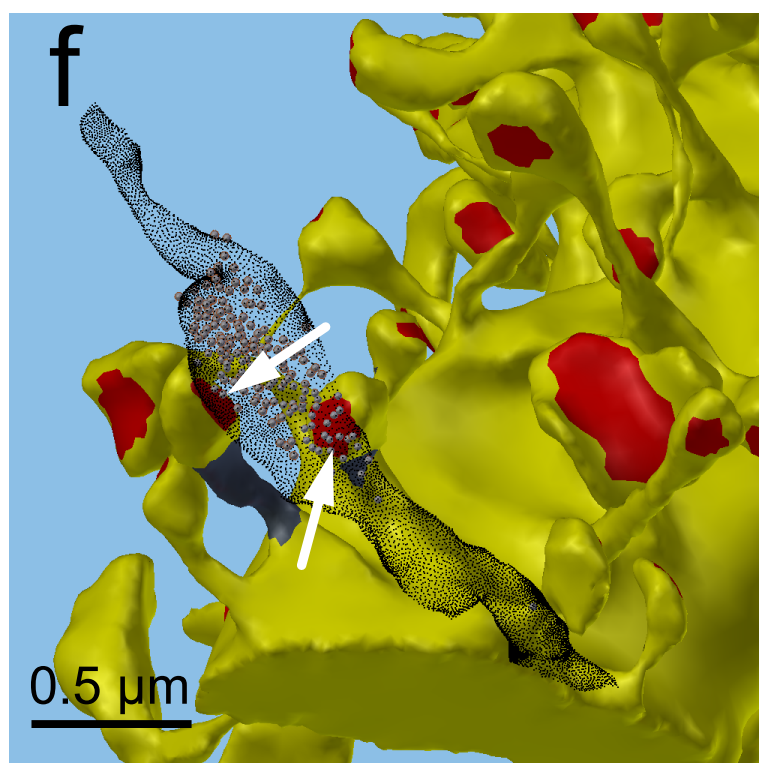

Supplement: supp [file elife_poa_e10778_Figure_4_figure_supplement_3.pdf › elife_poa_e10778_Figure_4_figure_supplement_3.pdf]

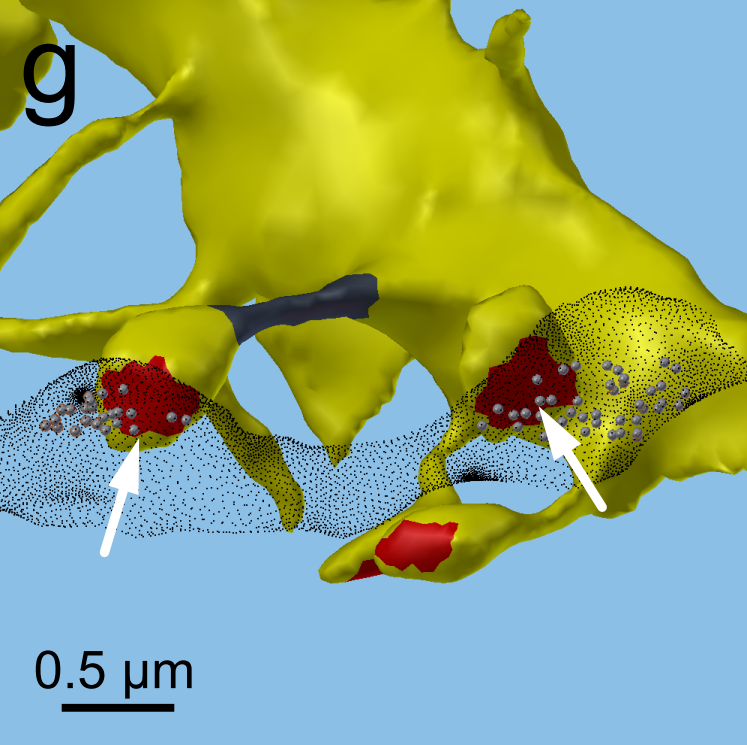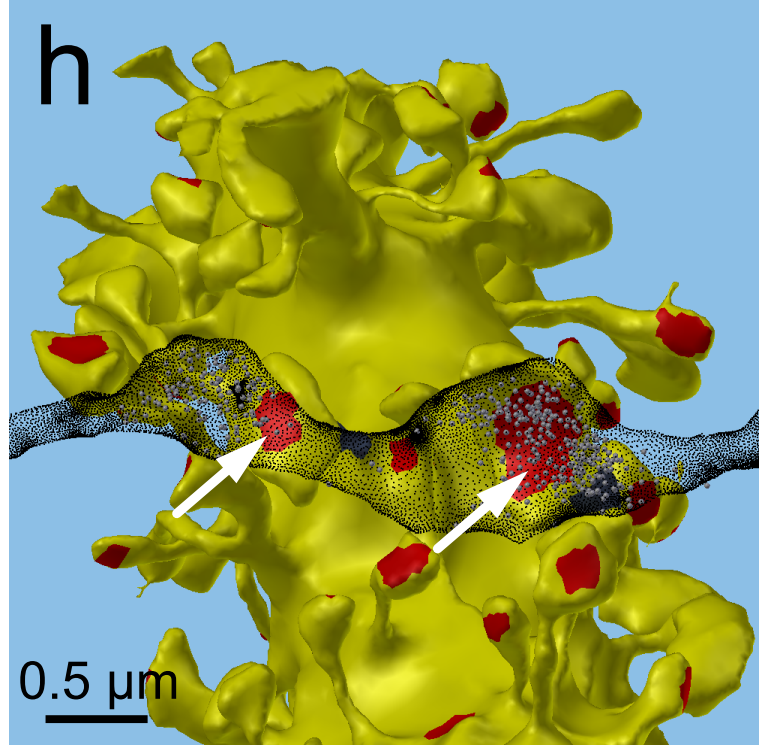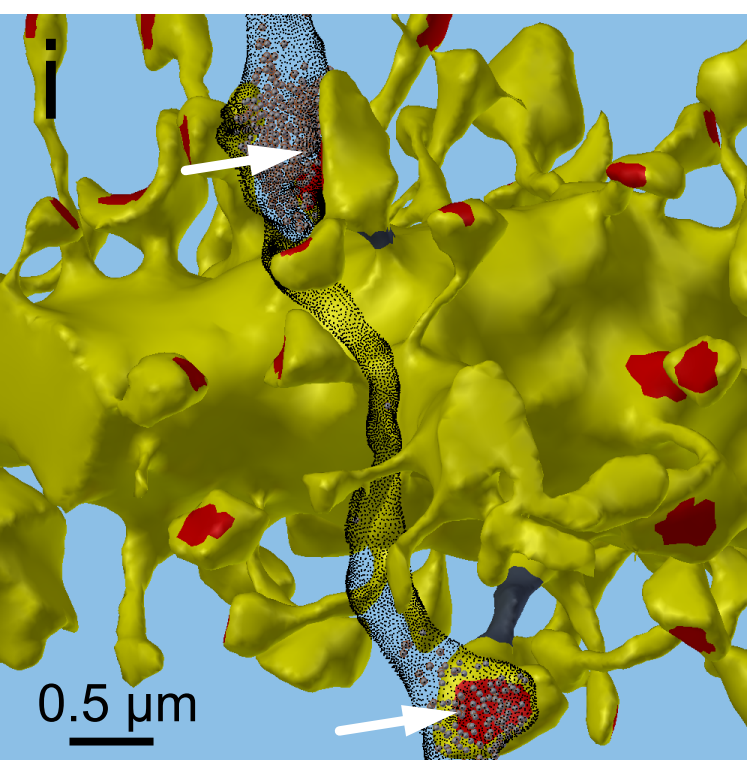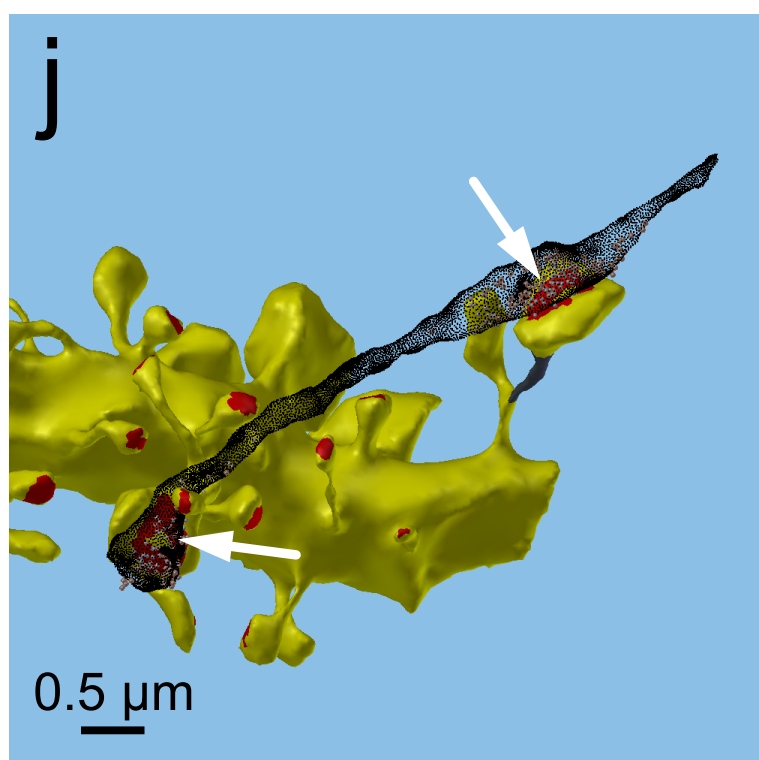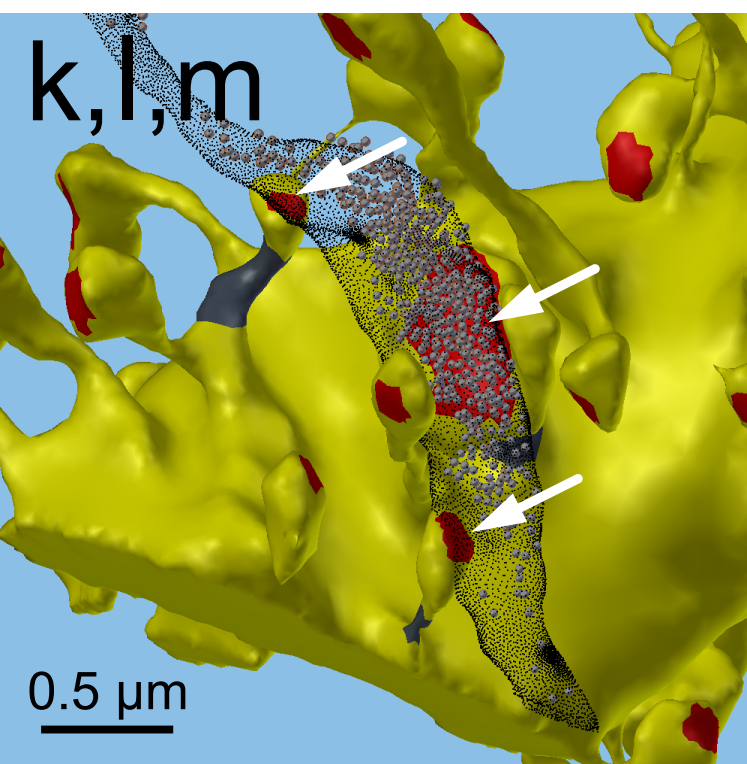

Supplement: supp [file elife_poa_e10778_Figure_4_figure_supplement_4.pdf › elife_poa_e10778_Figure_4_figure_supplement_4.pdf]

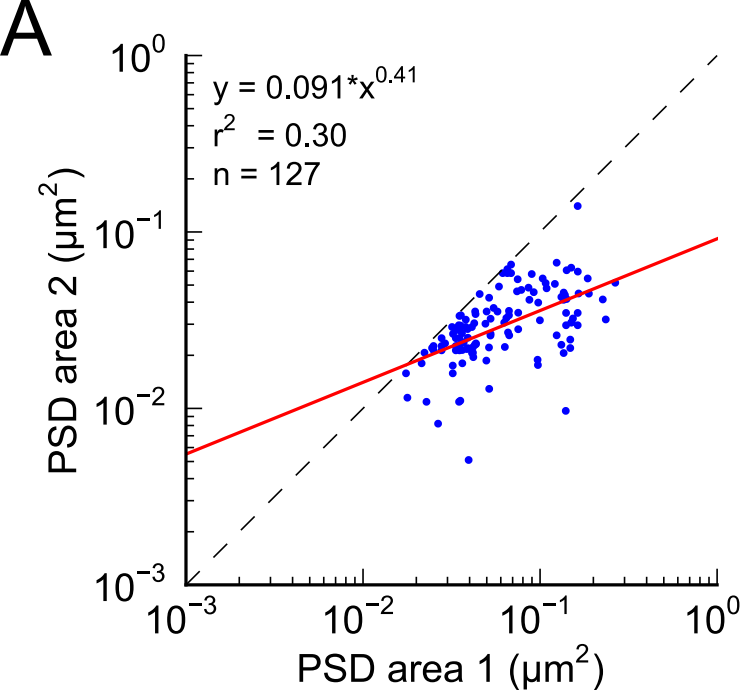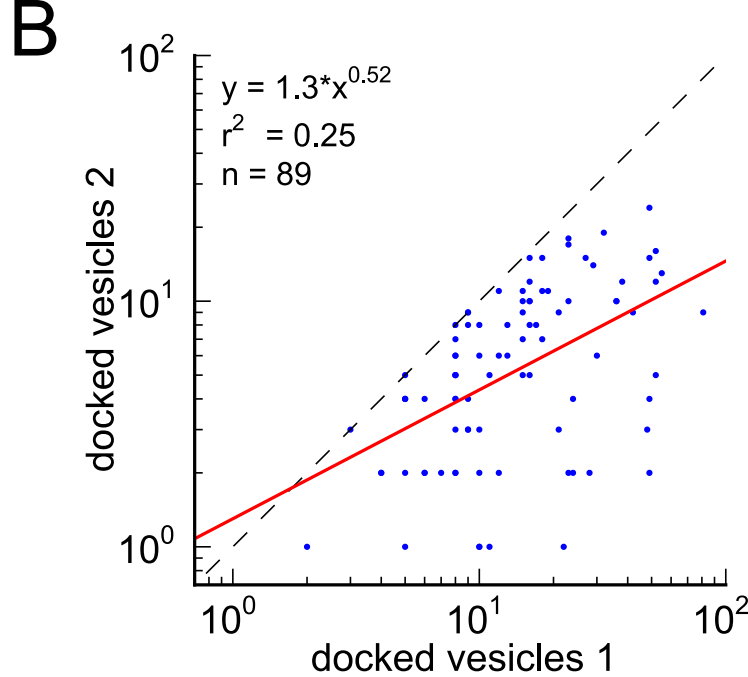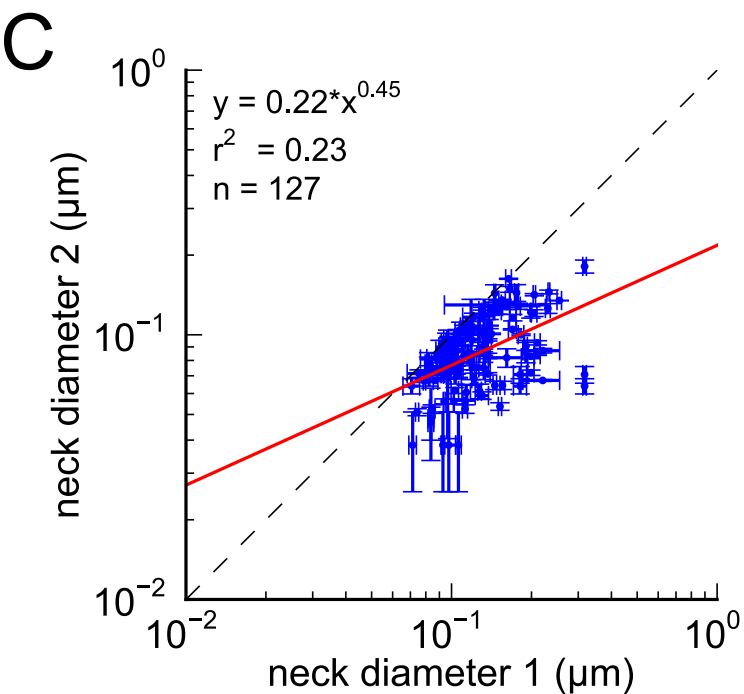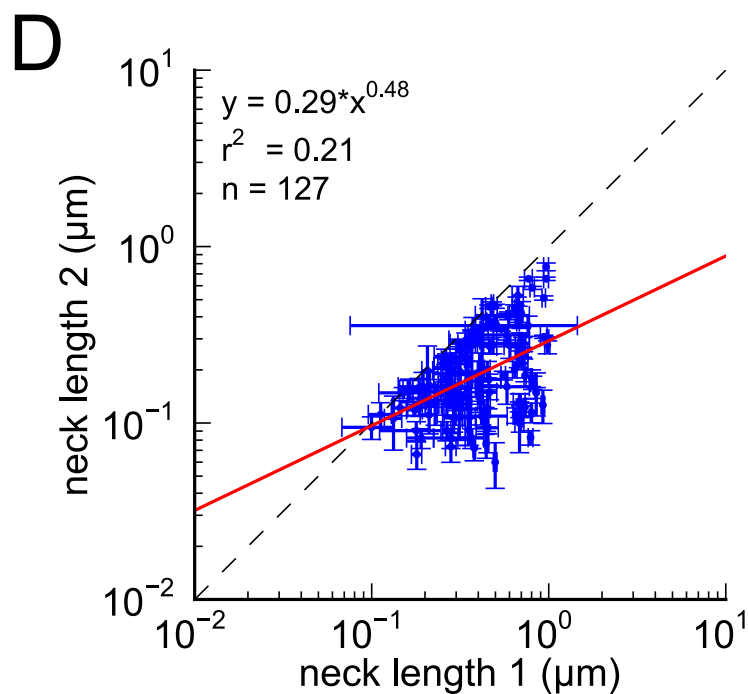

Supplement: supp [file elife_poa_e10778_Figure_6_figure_supplement_1.pdf › elife_poa_e10778_Figure_6_figure_supplement_1.pdf]
